# Supplementary material for: Rationally designed hierarchical ZnCo2O4/Ni(OH)2 nanostructures for high-performance pseudocapacitor electrodes
Source: Royal Society of Chemistry journal article supplement (doi:10.1039/c4ta05319b), 2014-01-01
Supplement: c4ta05319b1.pdf [file c4ta05319b1.pdf]

# Supporting Information

## **Rationally Designed Hierarchical ZnCo<sub>2</sub>O<sub>4</sub>/Ni(OH)<sub>2</sub> Nanostructures for High-Performance Pseudocapacitor Electrodes**

H. X. Chuo,<sup>a</sup> H. Gao,<sup>a</sup> Q. Yang,<sup>a</sup> N. Zhang,<sup>b</sup> W. B. Bu<sup>a</sup> and X. T. Zhang<sup>\*,a</sup>

<sup>a</sup> *Key Laboratory for Photonic and Electronic Bandgap Materials, Ministry of Education, School of Physics and Electronic Engineering, Harbin Normal University, Harbin 150025, P. R. China.*

<sup>b</sup> *Department of Chemistry and Chemical Biology, Cornell University, Ithaca, USA.*

---

\* Corresponding author email: [xtzhangzhang@hotmail.com](mailto:xtzhangzhang@hotmail.com)

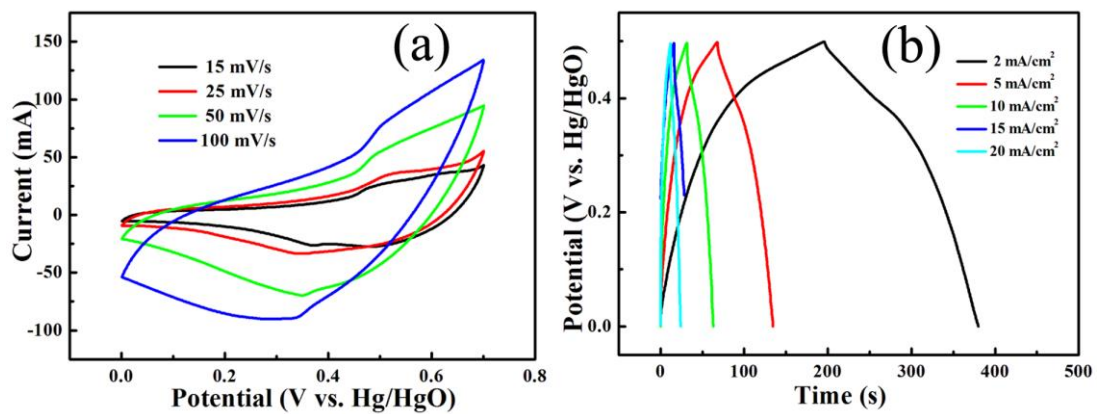

**Figure S1** (a) CV and (b) galvanostatic charge-discharge curves of ZnCo<sub>2</sub>O<sub>4</sub> nanowires at various scan rates and current densities.

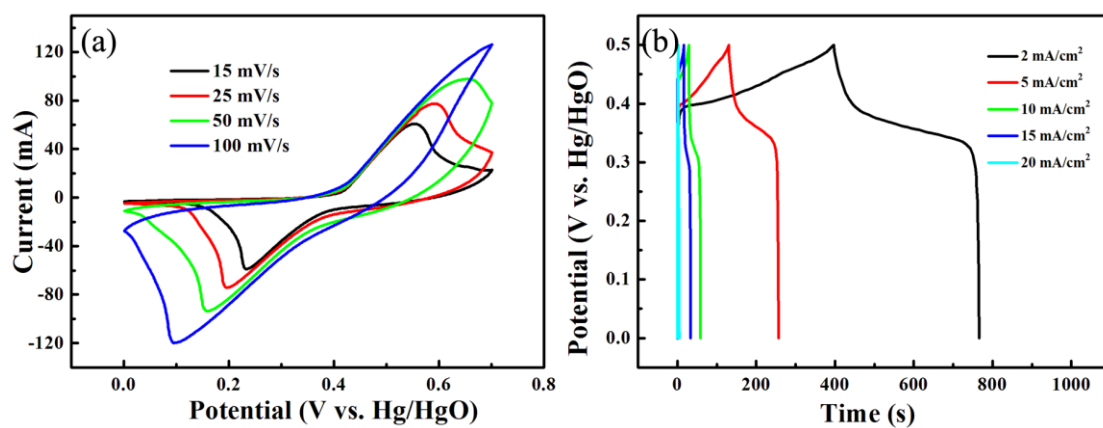

**Figure S2** (a) CV and (b) galvanostatic charge-discharge curves of Ni(OH)<sub>2</sub> nanosheets at various scan rates and current densities.

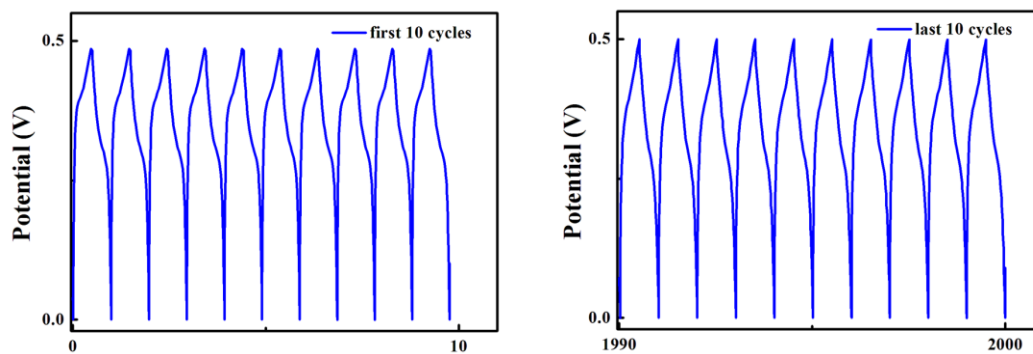

**Figure S3** Galvanostatic charge/discharge cyclic curves of the first and last 10 cycles, respectively.

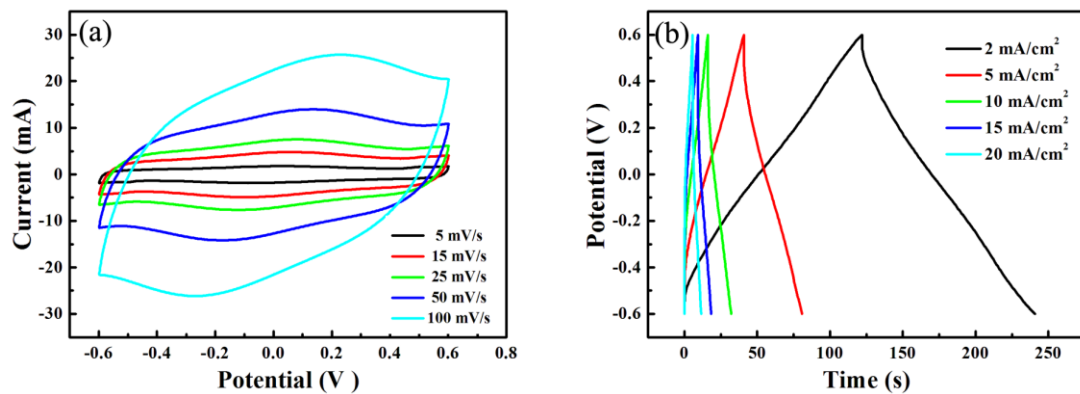

**Figure S4** (a) CV and (b) galvanostatic charge-discharge curves of ZnCo<sub>2</sub>O<sub>4</sub> nanowires at various scan rates and current densities in a two electrode system.

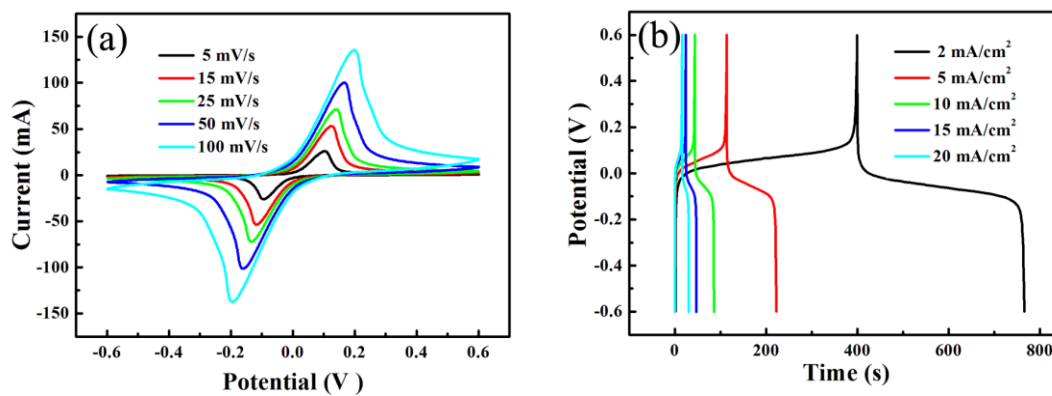

**Figure S5** (a) CV and (b) galvanostatic charge-discharge curves of Ni(OH)<sub>2</sub> nanosheets at various scan rates and current densities in a two electrode system.
